# Supplementary material for: Silver nanoparticle loaded PLGA composite nanoparticles for improving therapeutic efficacy of recombinant IFNγ by targeting the cell surface
Source: Royal Society of Chemistry journal article supplement (doi:10.1039/c3bm60251f), 2014-01-01
Supplement: c3bm60251f1.pdf [file c3bm60251f1.pdf]

## Supplementary Information

### Silver nanoparticle loaded PLGA composite nanoparticles for improving therapeutic efficacy of recombinant IFN $\gamma$ by targeting cell surface

Nidhi Chaubey<sup>a</sup>, Amaresh Kumar Sahoo<sup>b</sup>, Arun Chattopadhyay<sup>b,c</sup> and Siddhartha Sankar Ghosh<sup>a,b\*</sup>

<sup>a</sup>Department of Biotechnology, Indian Institute of Technology Guwahati, Guwahati, Assam, 781039, India. E-mail: sghosh@iitg.ernet.in

<sup>b</sup>Centre for Nanotechnology, Indian Institute of Technology Guwahati, Guwahati, Assam, 781039, India.

<sup>c</sup>Department of Chemistry, Indian Institute of Technology Guwahati, Guwahati, Assam, 781039, India.

### Results and Discussion

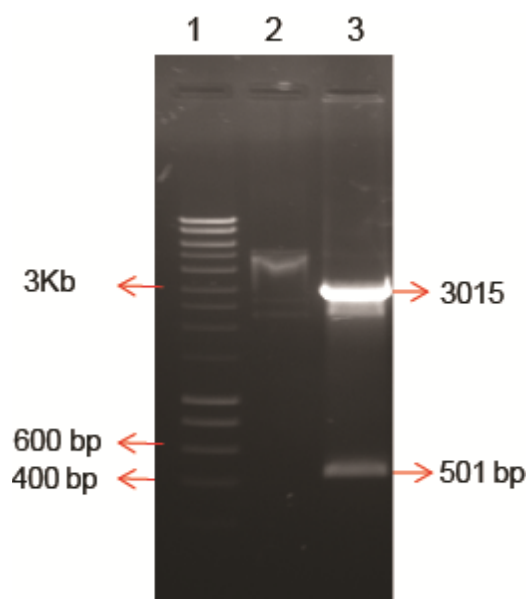

**Figure S1** Cloning of IFN $\gamma$  in pGEMT Easy bacterial cloning vector. Lane1: Uncut plasmid, Lane2: Hyper ladder, Lane 3: pGEMT- IFN $\gamma$  digested with Eco RI.

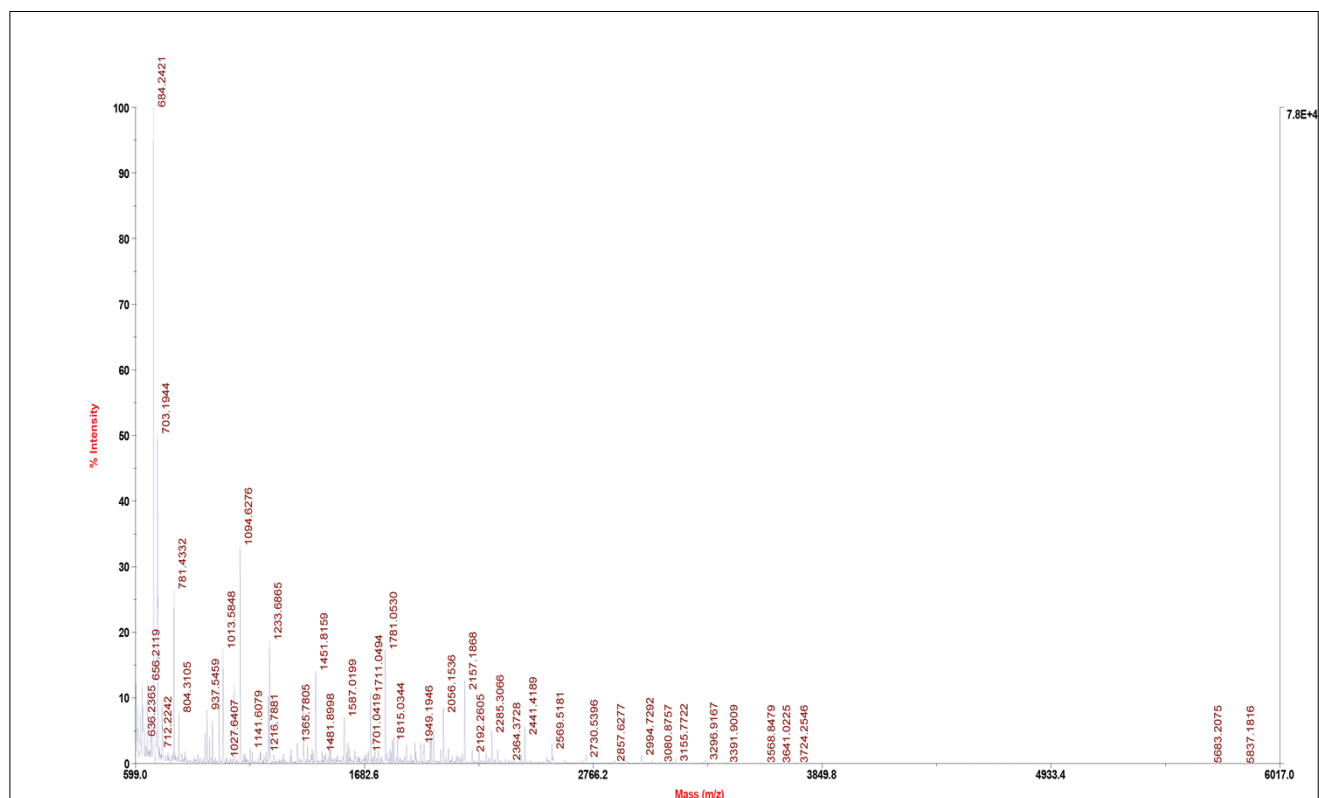

**Figure S2** MALDI TOF spectra of trypsin digested GST IFN $\gamma$  protein.

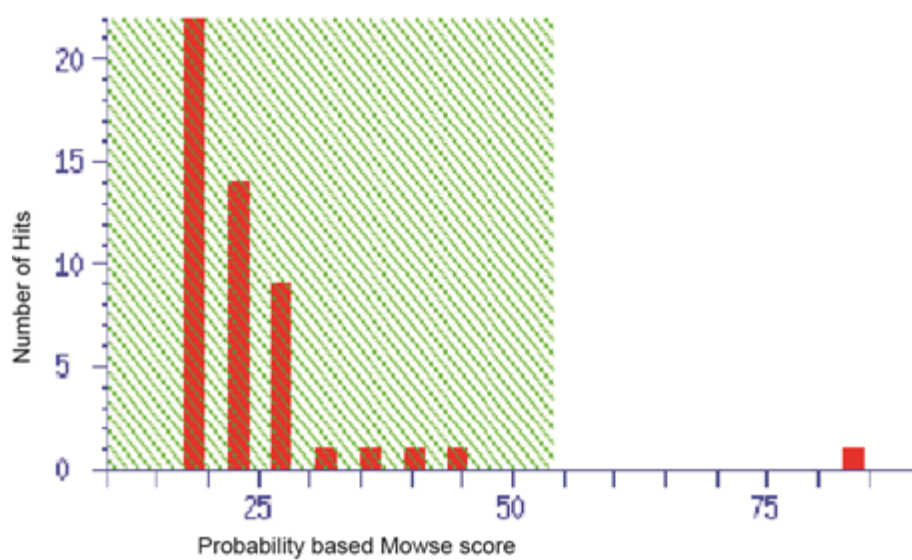

**Figure S3** Mascot cgi score graph of GST IFN $\gamma$  protein.

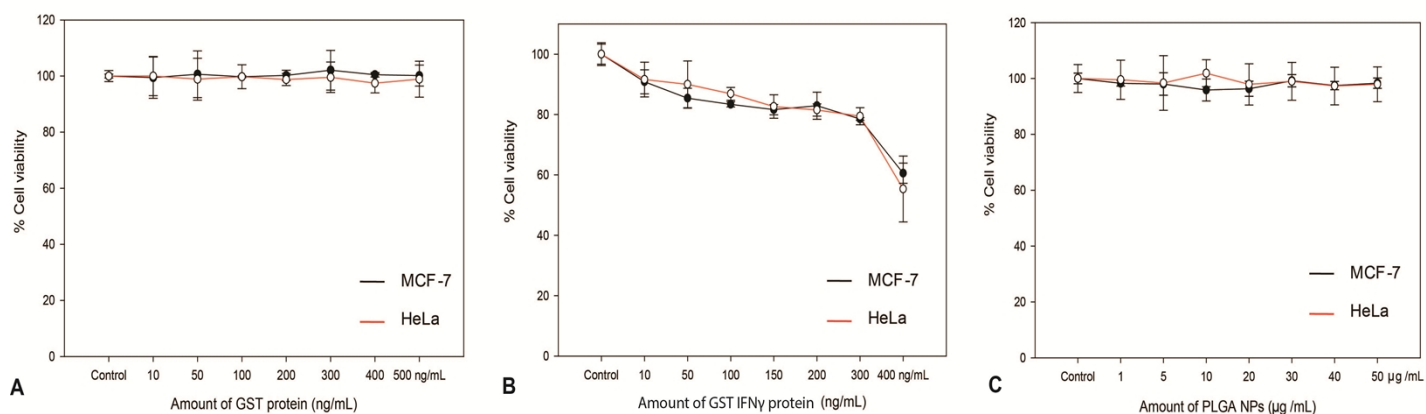

**Figure S4** MTT assay showing effect of **A.** GST protein on HeLa and MCF-7 cells **B.** GST IFN $\gamma$  protein on HeLa and MCF-7 cells **C.** PLGA NPs on HeLa and MCF-7 cells.

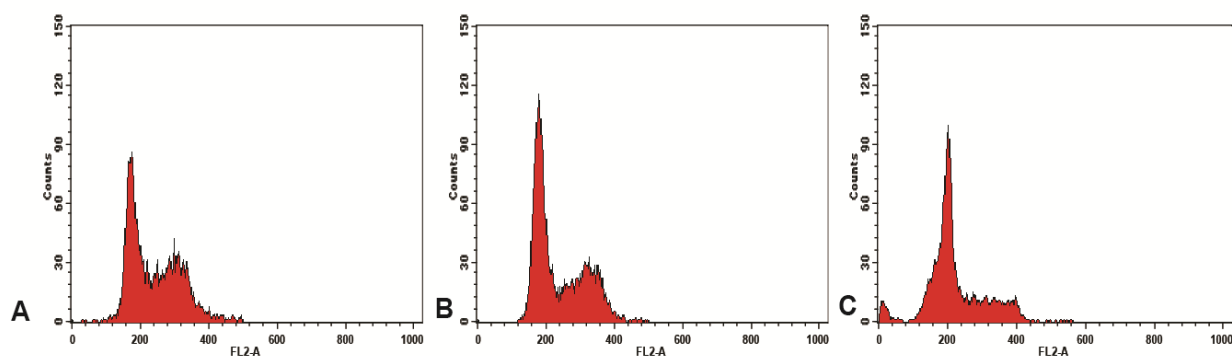

**Figure S5** Cell cycle analysis of HeLa cells **(A)** untreated **(B)** GST IFN $\gamma$  treated **(C)** Ag PLGA composite NPs treated cells.

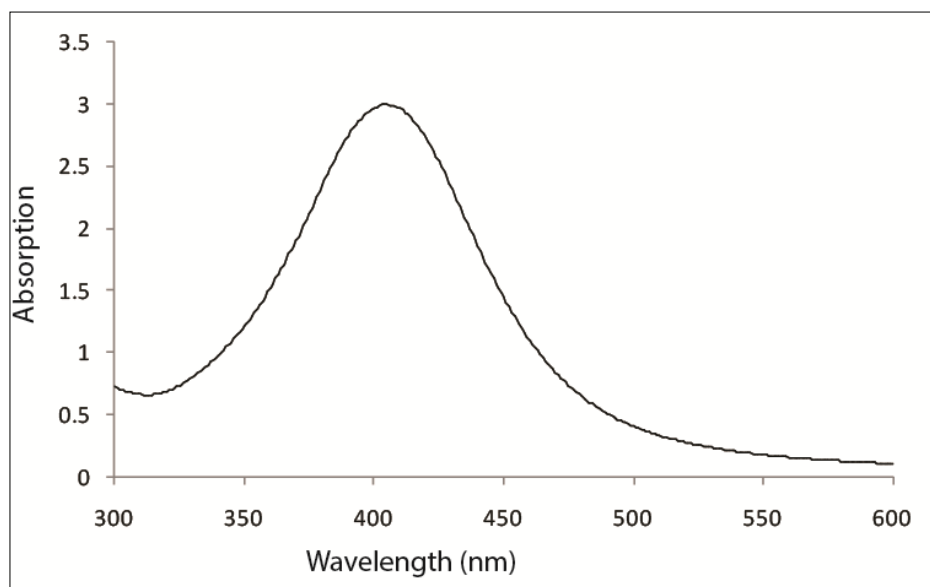

**Figure S6** UV-Vis spectra of the Ag NPs.

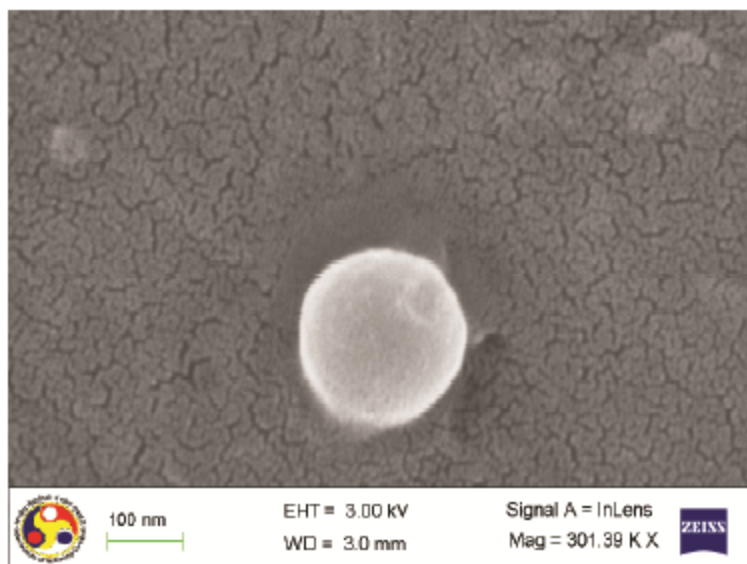

**Figure S7** FESEM analysis of Ag PLGA NPs.

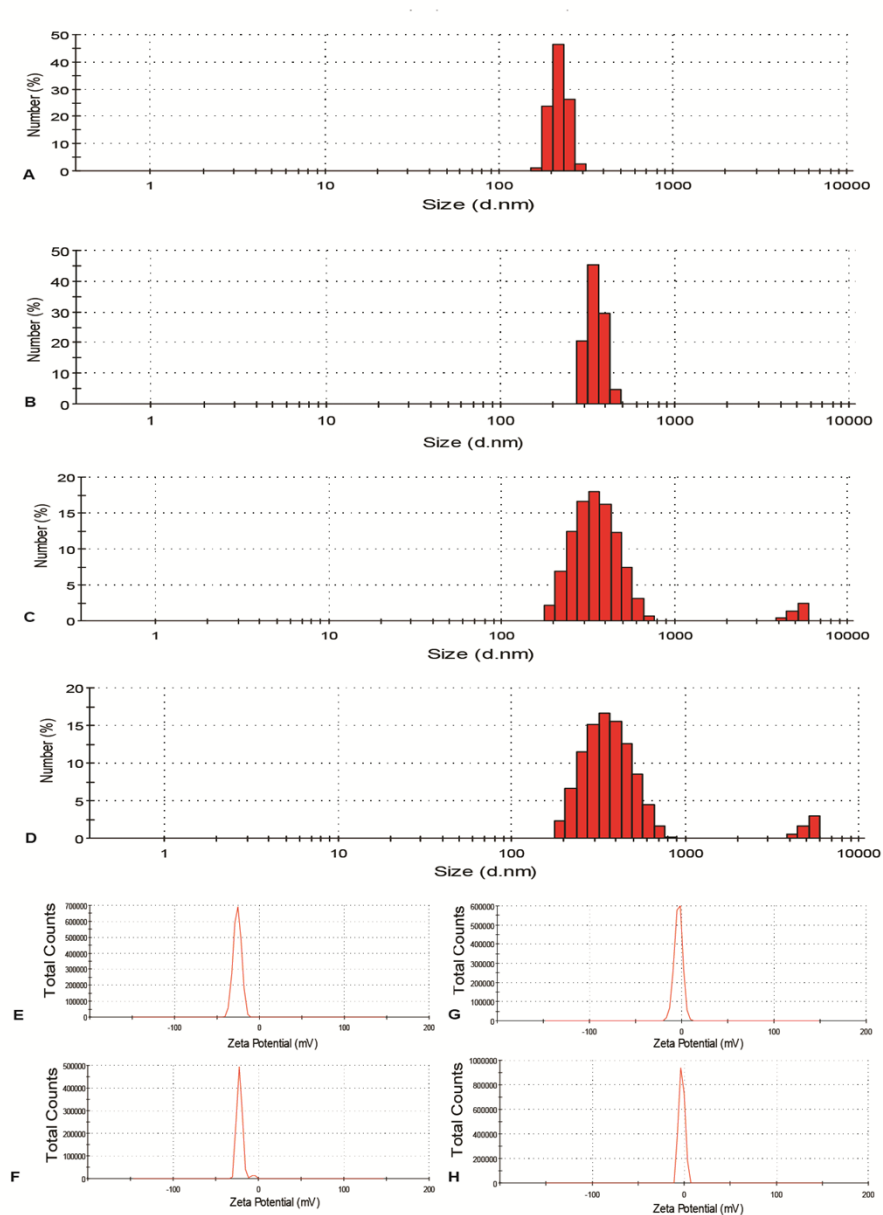

**Figure S8** Hydrodynamic diameter study of (A) PLGA NPs (B) PLGA NPs with IFN $\gamma$  (C) Ag PLGA NPs only (D) Ag PLGA with IFN $\gamma$ . (E) and (F) showing zeta potential of Ag PLGA nanocomposite and PLGA particles respectively. (G) and (H) are surface charge after GST IFN $\gamma$  protein incubation with composite Ag PLGA NPs and PLGA NPs.

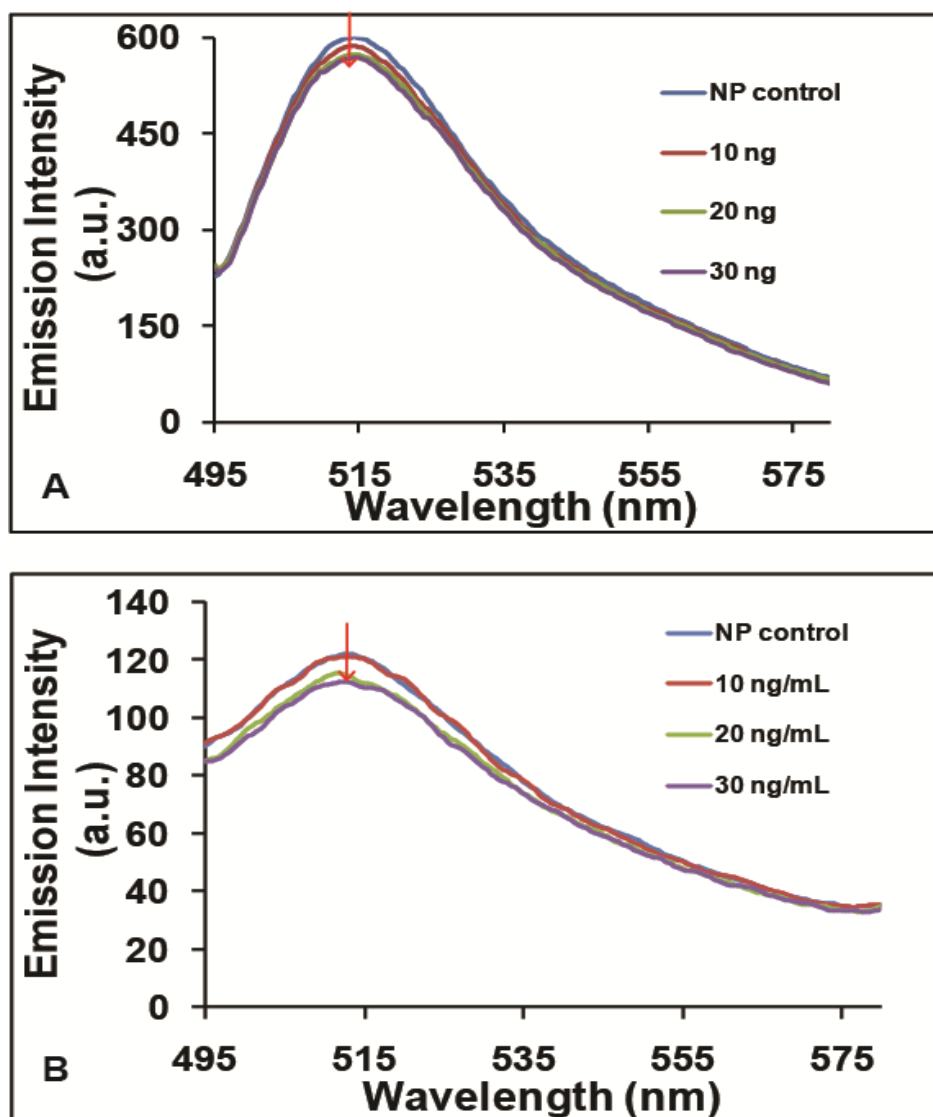

**Figure S9** Fluorescence emission study of FITC loaded (A) PLGA NPs (B) Ag PLGA NPs with addition of GST IFN $\gamma$  protein.

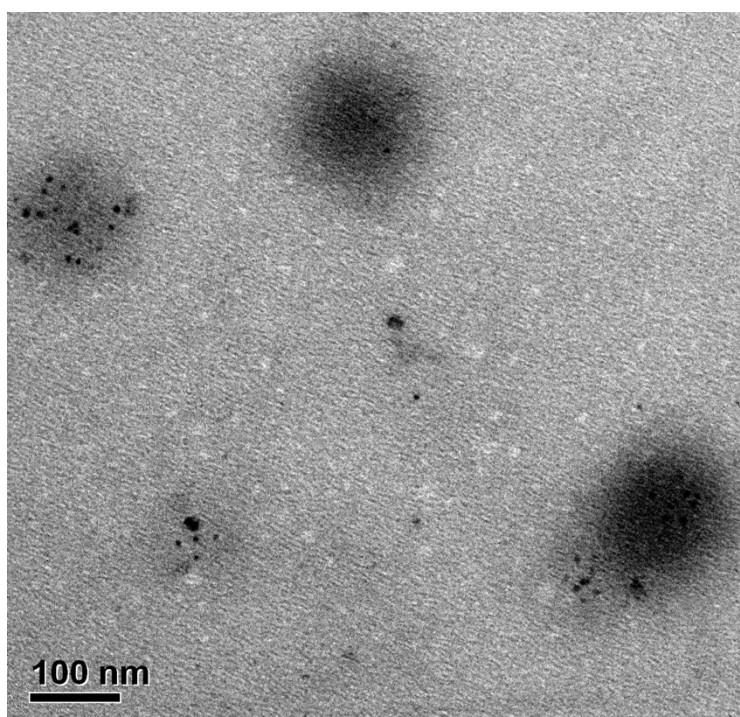

**Figure S10** TEM analysis of GST IFN $\gamma$  incubated Ag PLGA NPs.

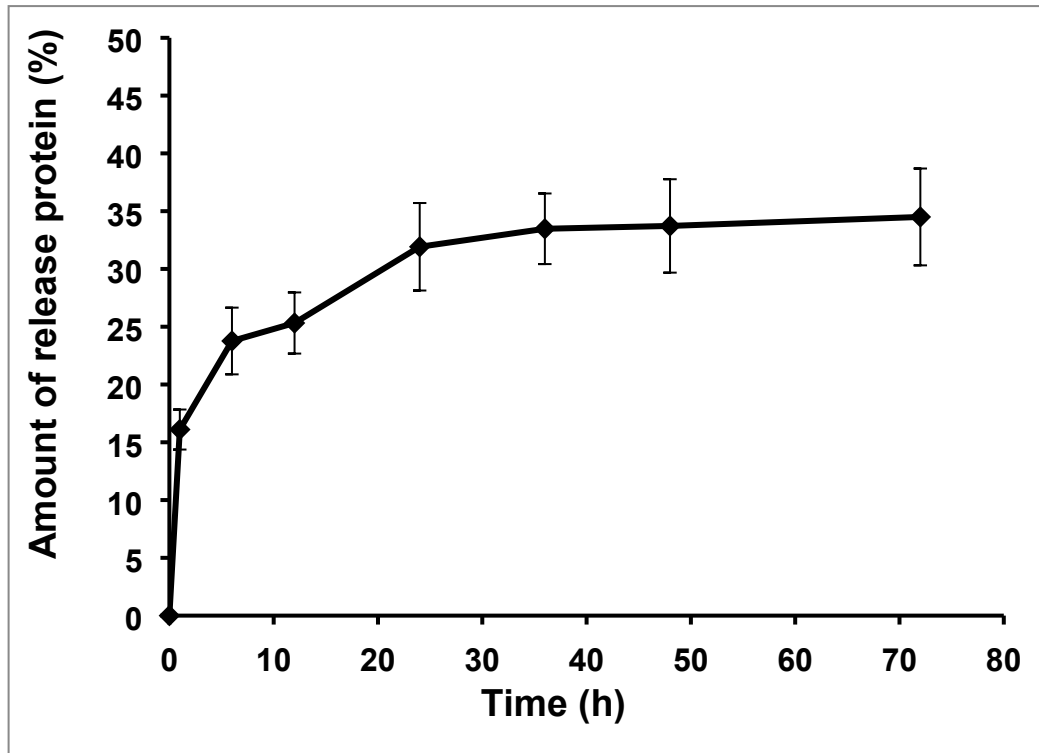

**Figure S11** GST IFN $\gamma$  protein release profile from Ag PLGA NPs.



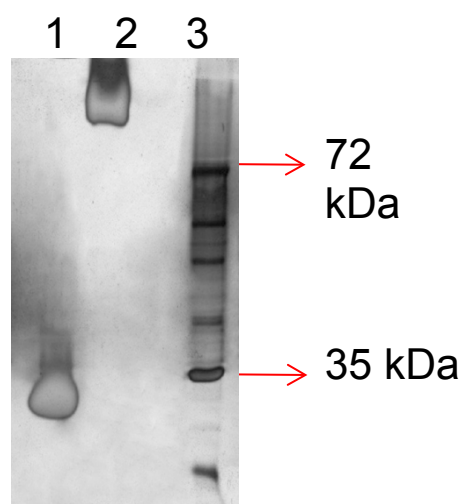

**Figure S12** SDS PAGE analysis for protease protection assay. Lane 1: GST IFN $\gamma$  protein digested with protease, Lane 2: GST IFN $\gamma$ - Ag PLGA NPs nanocomposite digested with protease, Lane 3: Nanocomposite only, Lane 4: Protein Marker
